# Supplementary material for: The hepcidin regulator erythroferrone is a new member of the erythropoiesis-iron-bone circuitry
Source: eLife. 2021 May 18;10:e68217. doi: 10.7554/eLife.68217 (PMC8205482; doi:10.7554/eLife.68217)
Supplement: Source data 1. [file elife-68217-data1.xlsx]

## Sheet: Fig 1A
Whole body		Femur		Tibia		L4-L6		BV/TV (%)		Tb.Th (um)
WT	Erfe-/-	WT	Erfe-/-	WT	Erfe-/-	WT	Erfe-/-	WT	Erfe-/-	WT	Erfe-/-
0.475	0.421	0.44695	0.19852	0.17205	0.05341	1.60829	1.34141	25.37	31.84	14.46	14.43
0.543	0.352	0.29554	0.17955	0.01777	0.01642	1.50299	1.33096	27.57	31.85	18.8	15.41
0.486	0.326	0.34371	0.14238	0.02215	0.12635	1.36671	1.26112	19.33	31.94	11.72	14.92

## Sheet: Fig 1B
Whole body		Femur		Tibia		L4-L6		BV/TV (%)		Tb.Th (um)
WT	Erfe-/-	WT	Erfe-/-	WT	Erfe-/-	WT	Erfe-/-	WT	Erfe-/-	WT	Erfe-/-
0.752	0.68	0.48335	0.35017	0.28366	0.21129	1.63164	1.75936	16.72	11.05	3.08	2.33
0.96	0.621	0.67481	0.22124	0.32484	0.11328	2.28481	1.56299	14.71	13.87	2.69	2.58
0.949	0.704	0.54814	0.23543	0.29793	0.14756	1.72157	1.54142	12.6	14.23	2.99	2.74
0.817	0.823	0.4815	0.51685	0.27618	0.30679	1.65762	1.81794	11.97	16.99	2.41	3.03
0.865	0.764	0.65764	0.3821	0.31626	0.13745	1.735	1.7879	19.51		2.77
0.875	0.859	0.69139	0.52849	0.37705	0.33086	1.70018	1.63117	13.69		2.79

## Sheet: Fig 1C
MS/BS		MAR		BFR
WT	Erfe-/-	WT	Erfe-/-	WT	Erfe-/-
0.782295	0.839628	3.69237	4.99723	2.88852	4.19581
0.627038	1.51737	3.54296	5.03389	2.22157	7.63828
0.727286	1.36952	3.52236	4.12422	2.56177	5.64819
0.847717	0.751883	3.55102	3.91881	3.01026	2.94649
0.198833		2.43622		0.484399

## Sheet: Fig 1D
MS/BS		MAR		BFR
WT	Erfe-/-	WT	Erfe-/-	WT	Erfe-/-
0.328689	0.362611	1.437	1.224	0.480335	0.341649
0.321593	0.404745	1.794	2.9215	0.578471	1.23908
0.39215	0.272169	3.21667	2.4665	0.681286	0.692144
0.340701	0.318215	1.63283	2.133	0.502479	0.688167
0.298194	0.275859	1.7184	1.94733	0.41039	0.55202
		1.35767

## Sheet: Fig 1E
Ob.S./BS		N.Ob/BS
WT	Erfe-/-	WT	Erfe-/-
1.12	0.64	4.735	4.745
0.68	0.676667	2.875	4.38667
0.645	0.855	3.11	5.295

## Sheet: Fig 1F
6 weeks old				5 months old
Oc.S./BS		N.Oc/BS		Oc.S./BS		N.Oc/BS
WT	Erfe-/-	WT	Erfe-/-	WT	Erfe-/-	WT	Erfe-/-
6.39	6.77	15.86	15.19	8.73	15.06	19.71	28.12
4.48	7.36	11.32	18.97	10.28	16.93	22.66	35.54
4.84	9.51	12.07	20.96	10.61	10.74	25.17	34.1
				15.51	18.79	28.24	41.04
				13.37		19.08
				1.47		13.02
				1.12		7.38
				1.1		10.28

## Sheet: Fig 2A
Erythroblast	Osteoblast	Osteoblast	Osteoblast	Osteoblast	Osteoblast
	day 0	day 3	day 6	day 14	day 21
0.999045	2.68396	14.7256	4.90011	3.29066	2.95792
1.20844	2.79992	10.1608	9.83435	1.60575	3.02121
0.828306	3.80343	6.2614	6.31225	2.394	1.20932
					3.05605

## Sheet: Fig 2B
Erythroblast	Osteoclast	Osteoclast	Osteoclast	Osteoclast	Osteoclast	Osteoclast
	day 0	day 1	day 2	day 3	day 4	day 5
1.27989	0.0817745	0.022748	0.707598	0.0634142	0.500055	0.364746
0.719897	0.0762395	0.762715	0.610557	0.52919	0.360393	0.680421
1	0.0784957	1.21675	0.0803616	2.70308	1.49006	1.06945
	0.0837672		0.0625207			0.373659
	0.618251		0.171793			0.390939
	0.650413		0.184717

## Sheet: Fig 2C
Osteoblast	Osteoblast	Osteoclast	Osteoclast
WT	Erfe-/-	WT	Erfe-/-
0.34	0.2	0.063	0.056
0.505	0.23	0.64	0.122
0.36	0.21	0.045	0.026
		0.028	0.123
			0.79

## Sheet: Fig 2D
control	WT	Erfe-/-
1.11524	0.3162	0.497547
1.21184	0.352011	0.467548
0.739922	0.292351	0.757261

[truncated: 14 more sheets: Fig 2E, Fig 3A, Fig 3B, Fig 3C, Fig 3D, Fig 3E, Fig 4B, Fig 4C, Fig 4D, Fig 4E, Fig 5A, Fig 5B, Fig 5C, Fig 5D]
