# Supplementary material for: The hepcidin regulator erythroferrone is a new member of the erythropoiesis-iron-bone circuitry
Source: eLife journal article supplement (doi:10.7554/elife.68217), 2021-05-18
Supplement: supp [file elife-68217-supp-v1.zip]

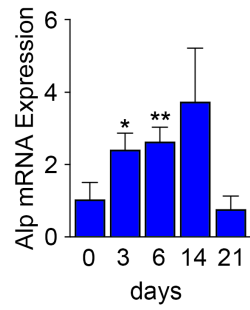

**Figure 2 - Figure Supplement 1: Alkaline Phosphatase Expression Increased During Osteoblast Differentiation in Culture.** As expected, alkaline phosphatase is increased in osteoblast culture conditions at day 3 and day 6, providing evidence of osteoblasts at the expected time frame. Statistics: Mean  $\pm$  SEM; unpaired two-tailed Student's *t*-test; \* $P < 0.05$ , \*\* $P < 0.01$ .
