# Supplementary material for: The hepcidin regulator erythroferrone is a new member of the erythropoiesis-iron-bone circuitry
Source: eLife journal article supplement (doi:10.7554/elife.68217), 2021-05-18
Supplement: supp [file elife-68217-supp-v1.zip]

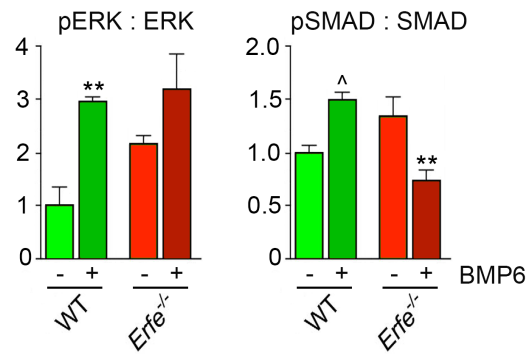

**Figure 3 - Figure Supplement 1: ERFE Function on Bone Involves BMP-6 Sequestration.** Similarly to effects of BMP2, signaling via the known BMP receptor pathways, namely ERK1/2 and Smad1/5/8, was further induced by BMP6 (50 ng/ml) only in WT but not in *Erfe*<sup>-/-</sup> osteoblasts. Statistics: Mean  $\pm$  SEM; unpaired two-tailed Student's *t*-test; ^0.05<P<0.1, \*\*P<0.01.
