# Supplementary material for: The hepcidin regulator erythroferrone is a new member of the erythropoiesis-iron-bone circuitry
Source: eLife journal article supplement (doi:10.7554/elife.68217), 2021-05-18
Supplement: supp [file elife-68217-supp-v1.zip]

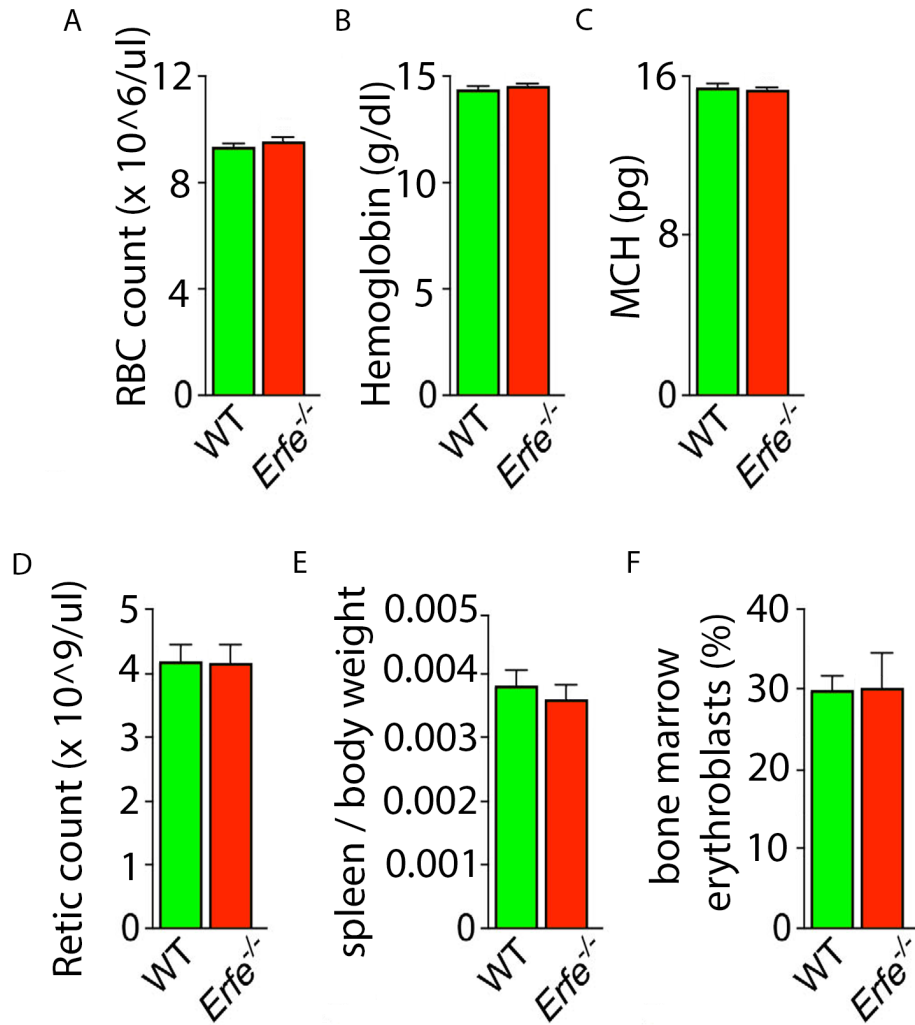

**Figure 1 - Figure Supplement 1: Erythropoiesis-related Parameters in *Erfe*<sup>-/-</sup> Mice.** We confirm previously reported lack of difference relative to wild type (WT) mice in red blood cell (RBC) count (A), hemoglobin (B), mean corpuscular hemoglobin (MCH) (C), reticulocyte count (D), spleen weight (E), and bone marrow erythroblast fraction (F). Statistics: Mean  $\pm$  SEM; unpaired two-tailed Student's *t*-test; *N*=4–5 mice per group.
