# Supplementary material for: The hepcidin regulator erythroferrone is a new member of the erythropoiesis-iron-bone circuitry
Source: eLife journal article supplement (doi:10.7554/elife.68217), 2021-05-18
Supplement: supp [file elife-68217-supp-v1.zip]

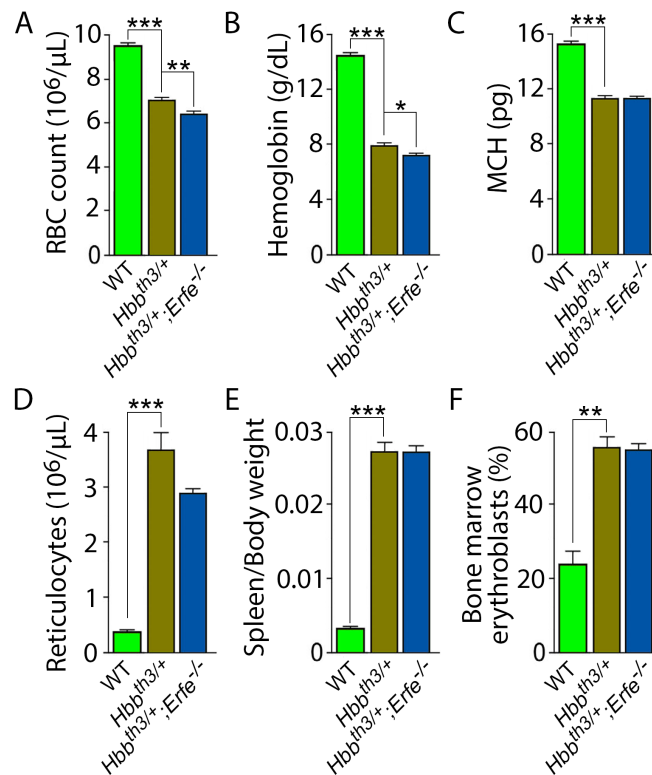

**Figure 5 - Figure Supplement 1: Erythropoiesis-related Parameters in *Hbb<sup>th3/+</sup>* and *Hbb<sup>th3/+</sup>;**Erfe<sup>-/-</sup>* Mutant Mice.** We confirm previously reported differences in relative to wild type (WT) mice with decreased red blood cell (RBC) count (A), hemoglobin (B) and mean corpuscular hemoglobin (MCH) (C) as well as increased reticulocyte count (D), spleen weight (E), and bone marrow erythroblast fraction (F) with only minor differences in RBC count and hemoglobin between *Hbb<sup>th3/+</sup>* and compound *Hbb<sup>th3/+</sup>;**Erfe<sup>-/-</sup>* mutant mice. Statistics: Mean  $\pm$  SEM; unpaired two-tailed Student's *t*-test; \*P<0.05, \*\*P<0.01, \*\*\*P<0.0001; N=4-5 mice per group.
